# Supplementary material for: A cautionary perspective regarding the isolation and serial propagation of SARS-CoV-2 in Vero cells
Source: PubMed Central journal article supplement (PMC8211640; doi:10.1038/s41541-021-00346-z), 2021-06-17
Supplement: 41541_2021_346_MOESM1_ESM.pdf [file 41541_2021_346_MOESM1_ESM.pdf]

**Supplementary Table 1. Sequencing statistics for all samples cited in Table 1**

| Sample ID                  | Passage                 | Cell          | Genome coverage |            |                 | FCS coverage  |             |              |
|----------------------------|-------------------------|---------------|-----------------|------------|-----------------|---------------|-------------|--------------|
|                            |                         |               | # of Reads      | % Coverage | Mean read depth | FCS Deletion  | Read depth* | % deletion** |
| PHE_COVID_Eng02_2171       | P1                      | Vero E6 ECACC | 1119074         | 100.00     | 4689            | None detected | 5603        | <1           |
| PHE_COVID_Eng02_2175       | P2                      | Vero E6 BEI   | 2221101         | 100.00     | 7185            | 23598-23621   | 5991        | 93.91        |
| PHE_COVID_Eng02_2176       | P2                      | Vero E6 BEI   | 1572395         | 100.00     | 5132            | 23598-23621   | 4176        | 74.89        |
| PHE_COVID_Eng02_2341       | P3                      | Vero E6 BEI   | 657460          | 99.93      | 2115            | 23598-23621   | 642         | 99.60        |
| PHE_COVID_Eng02_3134       | P2                      | Vero/hSLAM    | 2461490         | 100.00     | 7999            | 23609-23621   | 11146       | 1.20         |
| PHE_COVID_Eng02_3144       | P2                      | Calu-3        | 336962          | 99.99      | 1378            | None detected | 1598        | <1           |
| PHE_COVID_Eng02_3139       | P2                      | Calu-1        | 1252948         | 99.99      | 4094            | None detected | 4622        | <1           |
| PHE_COVID_Eng02_3541       | P2+1 (Calu-1 P1-P2)     | Vero E6 BEI   | 2997648         | 99.99      | 9767            | 23598-23621   | 12190       | 27.71        |
| PHE_COVID_Eng02_3568       | P2+1 (Calu-1 P1-P2)     | Vero E6 BEI   | 15548981        | 99.99      | 50940           | 23598-23621   | 14858       | 54.31        |
| PHE_COVID_Eng02_3586       | P2+1 (Calu-1 P1-P2)     | Vero E6 BEI   | 4289539         | 99.99      | 13921           | 23598-23621   | 45795       | 80.15        |
| PHE_COVID_Eng02_3540       | P2+1 (Calu-1 P1-P2)     | Vero E6 ECACC | 1672355         | 100.00     | 7220            | 23598-23621   | 11188       | 40.19        |
| PHE_COVID_Eng02_3567       | P2+1 (Calu-1 P1-P2)     | Vero E6 ECACC | 5273199         | 100.00     | 17193           | 23598-23621   | 18153       | 64.18        |
| PHE_COVID_Eng02_3585       | P2+1 (Calu-1 P1-P2)     | Vero E6 ECACC | 4433547         | 100.00     | 14470           | 23598-23621   | 13567       | 80.15        |
| PHE_COVID_Eng02_3254       | P2                      | Calu-1        | 3443497         | 99.99      | 11310           | 23598-23621   | 10690       | 4.54         |
| PHE_COVID_Eng02_3468       | P3                      | Calu-1        | 1886612         | 99.99      | 6192            | 23598-23621   | 8987        | 7.51         |
| PHE_COVID_Eng02_3466       | P3                      | Vero/hSLAM    | 3449103         | 99.99      | 11314           | 23598-23621   | 11609       | 8.72         |
| PHE_COVID_Eng02_3470       | P4                      | Vero/hSLAM    | 4269861         | 99.99      | 14018           | 23598-23621   | 14034       | 5.36         |
| PHE_COVID_Eng02_19_65_4xCO | P5                      | Vero/hSLAM    | 759752          | 99.99      | 2828            | 23598-23621   | 2870        | 13.18        |
| PHE_COVID_Eng02_H7_168h    | P3+1 (Vero/hSLAM P1-P3) | Vero E6 ECACC | 2791855         | 99.99      | 9137            | 23598-23621   | 10715       | 28.39        |
| PHE_COVID_Eng02_H7_336h    | P3+1 (Vero/hSLAM P1-P3) | Vero E6 ECACC | 1086387         | 99.99      | 4325            | 23598-23621   | 5437        | 80.52        |
| PHE_COVID_Eng02_H7_504h    | P3+1 (Vero/hSLAM P1-P3) | Vero E6 ECACC | 619718          | 100.00     | 2395            | 23598-23621   | 2619        | 95.29        |

\* Average read depth across area of deletion (or 23598-23621bp if no deletion)

\*\* Average percentage of reads containing deletion across sequence.

**Supplementary Table 2. Sequencing statistics for all samples cited in Table 2**

| Sample ID              | Passage | Cell       | Genome coverage |            |                 | FCS coverage |             |              |
|------------------------|---------|------------|-----------------|------------|-----------------|--------------|-------------|--------------|
|                        |         |            | # of Reads      | % Coverage | Mean read depth | FCS Deletion | Read depth* | % deletion** |
| PHE_COVID_Vic01_AS1349 | P3      | Vero/hSLAM | 2545422         | 100.00     | 8333.00         | No           | 9514.96     | <1%          |
| PHE_COVID_Vic01_AS1405 | P3      | Vero/hSLAM | 1746564         | 100.00     | 5600.99         | No           | 7586.71     | <1%          |
| PHE_COVID_Vic01_AS1415 | P4      | Vero/hSLAM | 3258235         | 100.00     | 10662.70        | No           | 1845.58     | <1%          |
| PHE_COVID_Vic01_AS1427 | P4      | Vero/hSLAM | 4004065         | 100.00     | 13121.90        | No           | 18474.61    | <1%          |

\* Average read depth across area of deletion (or 23598-23621bp if no deletion)

\*\* Average percentage of reads containing deletion across sequence.

**Supplementary Table 3. Sequencing statistics for all samples cited in Table 3**

| Sample ID                 | Passage | Cell               | Genome coverage |            |                 | FCS coverage (and percentage deletions or SNPs**) |             |                  |                  |                  |                  |           |           |           |
|---------------------------|---------|--------------------|-----------------|------------|-----------------|---------------------------------------------------|-------------|------------------|------------------|------------------|------------------|-----------|-----------|-----------|
|                           |         |                    | # of Reads      | % Coverage | Mean read depth | FCS Deletions                                     | Read depth* | %23583-23597 del | %23598-23607 del | %23594-23629 del | %23627-23635 del | % C23606T | % G23607A | % G23607T |
| BEI NR-52281 Lot 70033175 | P4      | Vero E6 (CRL-1586) | 3590997         | 99.9966    | 28221           | None detected                                     | 9476        | <1               | <1               | <1               | <1               | <1        | <1        | <1        |
| BEI NR-52281 Lot 70036318 | P4      | Vero E6 (CRL-1586) | 293017          | 99.9632    | 1372            | 23606                                             | 1785        | <1               | <1               | <1               | <1               | 9.17      | <1        | 15.93     |
| Seed_3175_Stock_0223_R1   | P5      | Vero E6            | 442647          | 99.90      | 5079            | 23583-23597                                       | 3924        | 10.00            | <1               | <1               | <1               | 3.5       | N/A       | 10.4      |
| Seed_3175_Stock_0427_R2   | P5      | Vero E6            | 385859          | 99.90      | 4453            | 23583-23598                                       | 2903        | 2.50             | <1               | <1               | <1               | 2.8       | 1.2       | 10.6      |
| Seed_3175_Stock_0616_R1   | P5      | Vero E6            | 604620          | 99.80      | 7084            | Multiple sites                                    | 3686        | 46.60            | 2.45             | <1               | 7.10             | 4.4       | 2.7       | 18.2      |
| Seed_3175_Stock_0616_R2   | P5      | Vero E6            | 603175          | 100.00     | 6988            | Multiple sites                                    | 3994        | 48.10            | 2.45             | <1               | 8.30             | 3.9       | 2.8       | 16.7      |
| Seed_6318_Stock_7142_R1   | P5      | Vero E6            | 593783          | 100.00     | 6974            | Multiple sites                                    | 2293        | 1.70             | <1               | 77.80            | <1               | 7.2       | 1.1       | 10.1      |
| Seed_6318_Stock_7142_R2   | P5      | Vero E6            | 382907          | 100.00     | 4392            | Multiple sites                                    | 3541        | 2.00             | <1               | 77.30            | <1               | 7.1       | 1.3       | 10.3      |
| Seed_6318_Stock_7152_R1   | P5      | Vero E6            | 604816          | 99.90      | 7014            | Multiple sites                                    | 3603        | 2.00             | <1               | 70.00            | <1               | 9.7       | 1.2       | 14.7      |
| Seed_6318_Stock_7152_R2   | P5      | Vero E6            | 424033          | 99.90      | 4832            | Multiple sites                                    | 3571        | 2.30             | <1               | 69.80            | <1               | 9.1       | 1.3       | 15.2      |
| Seed_6318_Stock_0825_R1   | P5      | Vero E6            | 598679          | 100.00     | 7006            | Multiple sites                                    | 2611        | 2.70             | <1               | 58.30            | <1               | 11.3      | 1.7       | 20.7      |
| Seed_6318_Stock_0825_R2   | P5      | Vero E6            | 599783          | 99.90      | 6993            | Multiple sites                                    | 4887        | 2.30             | <1               | 60.30            | <1               | 10        | 1.6       | 21.4      |

\* Average read depth across area of deletion (or 23598-23621bp if no deletion)  
Nucleotides 23603 to 23617 spans the PRRAR sequence

\*\* Average percentage of reads containing deletion or SNPs across sequence.

**Supplementary Table 4. Other notable variations in BEI Lots of stock NR-52281**

**BEI NR-52281 Lot 70033175 (FDA ARGOS GenBank MT246667)**

| Sample ID                 | Passage | Cell               | Type | Variant | Coverage | Quality | Length | Sample Frequency | Gene (Region)  | AA Mutation |
|---------------------------|---------|--------------------|------|---------|----------|---------|--------|------------------|----------------|-------------|
| BEI NR-52281 Lot 70033175 | P4      | Vero E6 (CRL-1586) | SNP  | c8782t  | 20,170   | 49,314  | 1      | 99.87%           | ORF1ab (nsp4)  | --          |
|                           |         |                    | SNP  | c18060t | 26,016   | 49,314  | 1      | 99.65%           | ORF1ab (nsp14) | --          |
|                           |         |                    | SNP  | t28144c | 81,777   | 49,314  | 1      | 99.70%           | ORF8           | L84S        |

**BEI, NR-52281, Lot 70036318 (GenBank MW811435)**

| Sample ID                 | Passage | Cell               | Type | Variant | Coverage | Quality | Length | Sample Frequency | Gene (Region)  | AA Mutation |
|---------------------------|---------|--------------------|------|---------|----------|---------|--------|------------------|----------------|-------------|
| BEI NR-52281 Lot 70036318 | P4      | Vero E6 (CRL-1586) | SNP  | c8782t  | 1,264    | 44,731  | 1      | 99.84%           | ORF1ab (nsp4)  | --          |
|                           |         |                    | SNP  | c17827a | 1,719    | 4,590   | 1      | 12.74%           | ORF1ab (nsp13) | Q531K       |
|                           |         |                    | SNP  | c18060t | 1,641    | 49,314  | 1      | 99.88%           | ORF1ab (nsp14) | --          |
|                           |         |                    | SNP  | a22206g | 842      | 780     | 1      | 5.45%            | S              | D215G       |
|                           |         |                    | SNP  | c22482t | 1,473    | 6,040   | 1      | 17.04%           | S              | T307I       |
|                           |         |                    | SNP  | c23606t | 1,785    | 2,477   | 1      | 9.17%            | S              | R682W       |
|                           |         |                    | SNP  | g23607t | 1,763    | 5,155   | 1      | 15.93%           | S              | R682L       |
|                           |         |                    | SNP  | t28144c | 2,584    | 49,314  | 1      | 99.92%           | OFR8           | L84S        |
|                           |         |                    | SNP  | a29839g | 1,142    | 435     | 1      | 5.10%            | 3' UTR         | n/a         |

**Supplementary Table 5. Sequence data and links for the samples cited in Tables 1-3**

| Submitting Institute                                        | Accession    | Strain                           | Link                                                                                                                  | Repository |
|-------------------------------------------------------------|--------------|----------------------------------|-----------------------------------------------------------------------------------------------------------------------|------------|
| Public Health England, Porton Down, UK                      | SAMN18713629 | SARS-CoV-2/human/England/02/2020 | <a href="https://www.ncbi.nlm.nih.gov/biosample/SAMN18713629">https://www.ncbi.nlm.nih.gov/biosample/SAMN18713629</a> | SRA        |
| Public Health England, Porton Down, UK                      | SAMN18713630 | SARS-CoV-2/human/England/02/2020 | <a href="https://www.ncbi.nlm.nih.gov/biosample/SAMN18713630">https://www.ncbi.nlm.nih.gov/biosample/SAMN18713630</a> | SRA        |
| Public Health England, Porton Down, UK                      | SAMN18713631 | SARS-CoV-2/human/England/02/2020 | <a href="https://www.ncbi.nlm.nih.gov/biosample/SAMN18713631">https://www.ncbi.nlm.nih.gov/biosample/SAMN18713631</a> | SRA        |
| Public Health England, Porton Down, UK                      | SAMN18713632 | SARS-CoV-2/human/England/02/2020 | <a href="https://www.ncbi.nlm.nih.gov/biosample/SAMN18713632">https://www.ncbi.nlm.nih.gov/biosample/SAMN18713632</a> | SRA        |
| Public Health England, Porton Down, UK                      | SAMN18713633 | SARS-CoV-2/human/England/02/2020 | <a href="https://www.ncbi.nlm.nih.gov/biosample/SAMN18713633">https://www.ncbi.nlm.nih.gov/biosample/SAMN18713633</a> | SRA        |
| Public Health England, Porton Down, UK                      | SAMN18713634 | SARS-CoV-2/human/England/02/2020 | <a href="https://www.ncbi.nlm.nih.gov/biosample/SAMN18713634">https://www.ncbi.nlm.nih.gov/biosample/SAMN18713634</a> | SRA        |
| Public Health England, Porton Down, UK                      | SAMN18713635 | SARS-CoV-2/human/England/02/2020 | <a href="https://www.ncbi.nlm.nih.gov/biosample/SAMN18713635">https://www.ncbi.nlm.nih.gov/biosample/SAMN18713635</a> | SRA        |
| Public Health England, Porton Down, UK                      | SAMN18713636 | SARS-CoV-2/human/England/02/2020 | <a href="https://www.ncbi.nlm.nih.gov/biosample/SAMN18713636">https://www.ncbi.nlm.nih.gov/biosample/SAMN18713636</a> | SRA        |
| Public Health England, Porton Down, UK                      | SAMN18713637 | SARS-CoV-2/human/England/02/2020 | <a href="https://www.ncbi.nlm.nih.gov/biosample/SAMN18713637">https://www.ncbi.nlm.nih.gov/biosample/SAMN18713637</a> | SRA        |
| Public Health England, Porton Down, UK                      | SAMN18713638 | SARS-CoV-2/human/England/02/2020 | <a href="https://www.ncbi.nlm.nih.gov/biosample/SAMN18713638">https://www.ncbi.nlm.nih.gov/biosample/SAMN18713638</a> | SRA        |
| Public Health England, Porton Down, UK                      | SAMN18713639 | SARS-CoV-2/human/England/02/2020 | <a href="https://www.ncbi.nlm.nih.gov/biosample/SAMN18713639">https://www.ncbi.nlm.nih.gov/biosample/SAMN18713639</a> | SRA        |
| Public Health England, Porton Down, UK                      | SAMN18713640 | SARS-CoV-2/human/England/02/2020 | <a href="https://www.ncbi.nlm.nih.gov/biosample/SAMN18713640">https://www.ncbi.nlm.nih.gov/biosample/SAMN18713640</a> | SRA        |
| Public Health England, Porton Down, UK                      | SAMN18713641 | SARS-CoV-2/human/England/02/2020 | <a href="https://www.ncbi.nlm.nih.gov/biosample/SAMN18713641">https://www.ncbi.nlm.nih.gov/biosample/SAMN18713641</a> | SRA        |
| Public Health England, Porton Down, UK                      | SAMN18713642 | SARS-CoV-2/human/England/02/2020 | <a href="https://www.ncbi.nlm.nih.gov/biosample/SAMN18713642">https://www.ncbi.nlm.nih.gov/biosample/SAMN18713642</a> | SRA        |
| Public Health England, Porton Down, UK                      | SAMN18713643 | SARS-CoV-2/human/England/02/2020 | <a href="https://www.ncbi.nlm.nih.gov/biosample/SAMN18713643">https://www.ncbi.nlm.nih.gov/biosample/SAMN18713643</a> | SRA        |
| Public Health England, Porton Down, UK                      | SAMN18713646 | SARS-CoV-2/human/England/02/2020 | <a href="https://www.ncbi.nlm.nih.gov/biosample/SAMN18713646">https://www.ncbi.nlm.nih.gov/biosample/SAMN18713646</a> | SRA        |
| Public Health England, Porton Down, UK                      | SAMN18713644 | SARS-CoV-2/human/AUS/VIC01/2020  | <a href="https://www.ncbi.nlm.nih.gov/biosample/SAMN18713644">https://www.ncbi.nlm.nih.gov/biosample/SAMN18713644</a> | SRA        |
| Public Health England, Porton Down, UK                      | SAMN18713645 | SARS-CoV-2/human/AUS/VIC01/2020  | <a href="https://www.ncbi.nlm.nih.gov/biosample/SAMN18713645">https://www.ncbi.nlm.nih.gov/biosample/SAMN18713645</a> | SRA        |
| National Institute for Biological Standards and Control, UK | SAMN18632196 | SARS-CoV-2/human/AUS/VIC01/2020  | <a href="https://www.ncbi.nlm.nih.gov/biosample/SAMN18632196">https://www.ncbi.nlm.nih.gov/biosample/SAMN18632196</a> | SRA        |
| National Institute for Biological Standards and Control, UK | SAMN18632233 | SARS-CoV-2/human/AUS/VIC01/2020  | <a href="https://www.ncbi.nlm.nih.gov/biosample/SAMN18632233">https://www.ncbi.nlm.nih.gov/biosample/SAMN18632233</a> | SRA        |
| University of Wiconsin-Madison, USA                         | SAMN14693018 | SARS-Cov2/human/USA/USA-WA1/2020 | <a href="https://www.ncbi.nlm.nih.gov/biosample/SAMN14693018">https://www.ncbi.nlm.nih.gov/biosample/SAMN14693018</a> | SRA        |
| University of Wiconsin-Madison, USA                         | SAMN16320573 | SARS-Cov2/human/USA/USA-WA1/2020 | <a href="https://www.ncbi.nlm.nih.gov/biosample/SAMN16320573">https://www.ncbi.nlm.nih.gov/biosample/SAMN16320573</a> | SRA        |
| University of Wiconsin-Madison, USA                         | SAMN16846875 | SARS-Cov2/human/USA/USA-WA1/2020 | <a href="https://www.ncbi.nlm.nih.gov/biosample/SAMN16846875">https://www.ncbi.nlm.nih.gov/biosample/SAMN16846875</a> | SRA        |
| University of Wiconsin-Madison, USA                         | SAMN16846874 | SARS-Cov2/human/USA/USA-WA1/2020 | <a href="https://www.ncbi.nlm.nih.gov/biosample/SAMN16846874">https://www.ncbi.nlm.nih.gov/biosample/SAMN16846874</a> | SRA        |
| University of Wiconsin-Madison, USA                         | SAMN16320580 | SARS-Cov2/human/USA/USA-WA1/2020 | <a href="https://www.ncbi.nlm.nih.gov/biosample/SAMN16320580">https://www.ncbi.nlm.nih.gov/biosample/SAMN16320580</a> | SRA        |
| University of Wiconsin-Madison, USA                         | SAMN16320581 | SARS-Cov2/human/USA/USA-WA1/2020 | <a href="https://www.ncbi.nlm.nih.gov/biosample/SAMN16320581">https://www.ncbi.nlm.nih.gov/biosample/SAMN16320581</a> | SRA        |
| University of Wiconsin-Madison, USA                         | SAMN16320578 | SARS-Cov2/human/USA/USA-WA1/2020 | <a href="https://www.ncbi.nlm.nih.gov/biosample/SAMN16320578">https://www.ncbi.nlm.nih.gov/biosample/SAMN16320578</a> | SRA        |
| University of Wiconsin-Madison, USA                         | SAMN16320579 | SARS-Cov2/human/USA/USA-WA1/2020 | <a href="https://www.ncbi.nlm.nih.gov/biosample/SAMN16320579">https://www.ncbi.nlm.nih.gov/biosample/SAMN16320579</a> | SRA        |
| University of Wiconsin-Madison, USA                         | SAMN16320574 | SARS-Cov2/human/USA/USA-WA1/2020 | <a href="https://www.ncbi.nlm.nih.gov/biosample/SAMN16320574">https://www.ncbi.nlm.nih.gov/biosample/SAMN16320574</a> | SRA        |
| University of Wiconsin-Madison, USA                         | SAMN16320575 | SARS-Cov2/human/USA/USA-WA1/2020 | <a href="https://www.ncbi.nlm.nih.gov/biosample/SAMN16320575">https://www.ncbi.nlm.nih.gov/biosample/SAMN16320575</a> | SRA        |
| University of Wiconsin-Madison, USA                         | SAMN16320582 | SARS-Cov2/human/USA/USA-WA1/2020 | <a href="https://www.ncbi.nlm.nih.gov/biosample/SAMN16320582">https://www.ncbi.nlm.nih.gov/biosample/SAMN16320582</a> | SRA        |
| University of Wiconsin-Madison, USA                         | SAMN16320583 | SARS-Cov2/human/USA/USA-WA1/2020 | <a href="https://www.ncbi.nlm.nih.gov/biosample/SAMN16320583">https://www.ncbi.nlm.nih.gov/biosample/SAMN16320583</a> | SRA        |
| National Institute of Allergy and Infectious Disease, USA   | MT246667.1   | SARS-Cov2/human/USA/USA-WA1/2020 | <a href="https://www.ncbi.nlm.nih.gov/nuccore/MT246667.1">https://www.ncbi.nlm.nih.gov/nuccore/MT246667.1</a>         | GenBank    |
| National Institute of Allergy and Infectious Disease, USA   | MW811435.1   | SARS-Cov2/human/USA/USA-WA1/2020 | <a href="https://www.ncbi.nlm.nih.gov/nuccore/MW811435.1">https://www.ncbi.nlm.nih.gov/nuccore/MW811435.1</a>         | GenBank    |
